# Supplementary material
Source: publisher site journal article supplement (https://www.dovepress.com/article/387117)
Supplement: Supplementary file 1 [file get_supplementary_file.php]

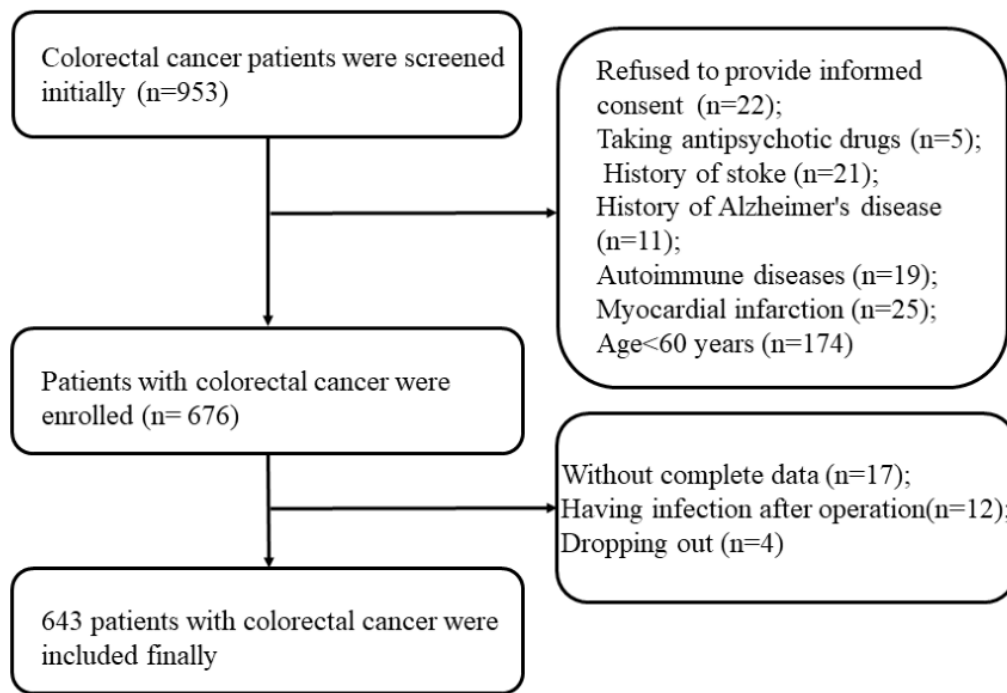

**Supplementary Figure 1.** Participant flow diagram.

**Supplementary Table 1.** Univariate logistic regression analyses to identify the risk factors for postoperative delirium in laparoscopic surgery

| Variables                      | <i>B</i> | S.E.  | Wals  | <i>P</i> -value | OR    | 95% CI        |
|--------------------------------|----------|-------|-------|-----------------|-------|---------------|
| Age, years                     |          |       |       |                 |       |               |
| > 70 vs. ≤ 70                  | 0.510    | 0.210 | 5.876 | <b>0.015</b>    | 1.666 | 1.103 – 2.516 |
| Sex                            |          |       |       |                 |       |               |
| Male vs. Female                | 0.349    | 0.223 | 2.440 | 0.118           | 1.417 | 0.915 – 2.196 |
| Smoking                        |          |       |       |                 |       |               |
| Yes vs. No                     | 0.564    | 0.219 | 6.631 | <b>0.010</b>    | 1.758 | 1.144 – 2.700 |
| Drinking                       |          |       |       |                 |       |               |
| Yes vs. No                     | 0.297    | 0.245 | 1.475 | 0.225           | 1.346 | 0.833 – 2.175 |
| Hypertension                   |          |       |       |                 |       |               |
| Yes vs. No                     | -0.056   | 0.210 | 0.072 | 0.789           | 0.945 | 0.626 – 1.427 |
| Diabetes mellitus              |          |       |       |                 |       |               |
| Yes vs. No                     | 0.791    | 0.297 | 7.085 | <b>0.008</b>    | 2.206 | 1.232 – 3.950 |
| Types of CRC                   |          |       |       |                 |       |               |
| Rectal cancer vs. Colon cancer | 0.284    | 0.210 | 1.821 | 0.177           | 1.328 | 0.879 – 2.007 |
| TNM stage                      |          |       |       |                 |       |               |
| III vs. I - II                 | 0.013    | 0.227 | 0.003 | 0.954           | 1.013 | 0.649 – 1.582 |
| Blood loss, ml                 |          |       |       |                 |       |               |
| > 140 vs. ≤ 140                | 0.140    | 0.209 | 0.445 | 0.505           | 1.150 | 0.763 – 1.734 |

|                      |        |       |        |                   |       |               |
|----------------------|--------|-------|--------|-------------------|-------|---------------|
| ASA score            |        |       |        |                   |       |               |
| III vs. I - II       | 0.221  | 0.276 | 0.640  | 0.424             | 1.247 | 0.726 – 2.143 |
| University education |        |       |        |                   |       |               |
| Yes vs. No           | -0.045 | 0.216 | 0.044  | 0.833             | 0.956 | 0.626 – 1.458 |
| MMSE score           |        |       |        |                   |       |               |
| ≤ 26 vs. >26         | 0.300  | 0.255 | 1.381  | 0.240             | 1.349 | 0.819 – 2.223 |
| BMI                  |        |       |        |                   |       |               |
| ≤ 24 vs. > 24        | -0.244 | 0.373 | 0.428  | 0.513             | 0.783 | 0.377 – 1.627 |
| Intestinal stoma     |        |       |        |                   |       |               |
| Yes vs. No           | 0.316  | 0.210 | 2.261  | 0.133             | 1.371 | 0.909 – 2.070 |
| Operation time, h    |        |       |        |                   |       |               |
| > 3.7 vs. ≤ 3.7      | -0.204 | 0.217 | 0.882  | 0.348             | 0.816 | 0.533 – 1.248 |
| Anesthesia time, h   |        |       |        |                   |       |               |
| > 3.9 vs. ≤ 3.9      | -0.121 | 0.212 | 0.329  | 0.566             | 0.886 | 0.585 – 1.341 |
| Narcotic drugs       |        |       |        |                   |       |               |
| Dexmedetomidine      |        |       |        |                   |       |               |
| Yes vs. No           | 0.032  | 0.211 | 0.023  | 0.878             | 1.033 | 0.683 – 1.561 |
| Propofol             |        |       |        |                   |       |               |
| Yes vs. No           | 0.159  | 0.221 | 0.520  | 0.471             | 1.173 | 0.760 – 1.809 |
| COPD                 |        |       |        |                   |       |               |
| Yes vs. No           | 1.135  | 0.272 | 17.393 | <b>&lt;0.001</b>  | 3.112 | 1.825 – 5.306 |
| Anemia               |        |       |        |                   |       |               |
| Yes vs. No           | 0.192  | 0.270 | 0.504  | 0.478             | 1.212 | 0.713 – 2.058 |
| CRP levels (mg/L)    |        |       |        |                   |       |               |
| Preoperatively       |        |       |        |                   |       |               |
| > 3.7 vs. ≤ 3.7      | 0.077  | 0.209 | 0.137  | 0.712             | 1.080 | 0.717 – 1.629 |
| Postoperative day 1  |        |       |        |                   |       |               |
| > 48 vs. ≤ 48        | 1.737  | 0.258 | 45.272 | <b>&lt; 0.001</b> | 5.682 | 3.425 – 9.425 |

TNM, tumor node metastasis; COPD, chronic obstructive pulmonary disease; CRC, colorectal cancer; CRP, C-reactive protein; BMI, body mass index; MMSE score, Mini-mental State Examination score. Bold values are statistically significant ( $P < 0.05$ ).

**Supplementary Table 2.** Multivariate logistic regression analyses to identify the risk factors for postoperative delirium in laparoscopic surgery

| Variables         | <i>B</i> | S.E.  | Wals  | <i>P</i> -value | OR    | 95% CI        |
|-------------------|----------|-------|-------|-----------------|-------|---------------|
| Age, years        |          |       |       |                 |       |               |
| > 70 vs. ≤ 70     | 0.637    | 0.232 | 7.514 | <b>0.006</b>    | 1.891 | 1.199 – 2.982 |
| Smoking           |          |       |       |                 |       |               |
| Yes vs. No        | 0.486    | 0.241 | 4.063 | <b>0.044</b>    | 1.626 | 1.014 – 2.607 |
| Diabetes mellitus |          |       |       |                 |       |               |
| Yes vs. No        | 0.966    | 0.344 | 7.863 | <b>0.005</b>    | 2.627 | 1.337 – 5.160 |
| COPD              |          |       |       |                 |       |               |

|                     |       |       |        |                   |       |                |
|---------------------|-------|-------|--------|-------------------|-------|----------------|
| Yes vs. No          | 1.108 | 0.307 | 13.021 | <b>&lt;0.001</b>  | 3.028 | 1.659 – 5.528  |
| CRP levels (mg/L)   |       |       |        |                   |       |                |
| Postoperative day 1 |       |       |        |                   |       |                |
| > 48 vs. ≤ 48       | 1.865 | 0.269 | 48.047 | <b>&lt; 0.001</b> | 6.459 | 3.811 – 10.945 |

---

COPD, chronic obstructive pulmonary disease; CRP, C-reactive protein. Bold values are statistically significant ( $P < 0.05$ ).
